# Supplementary material for: Dense GM-CSFR α -expressing immune infiltration is allied with longer survival of intrahepatic cholangiocarcinoma patients
Source: PeerJ journal article supplement (doi:10.7717/peerj.14883), 2023-03-02

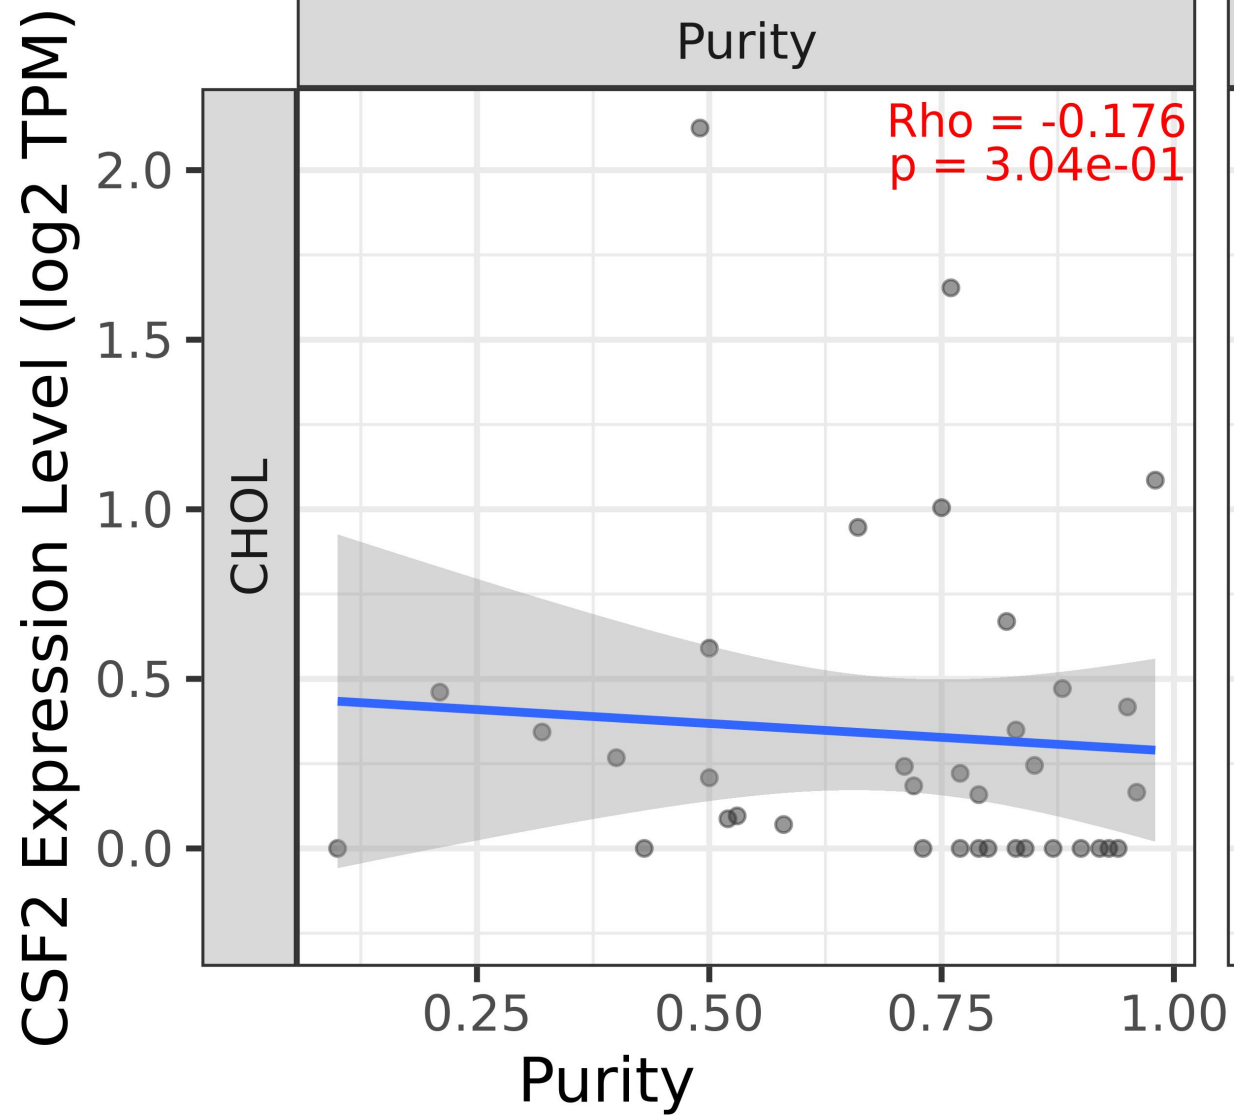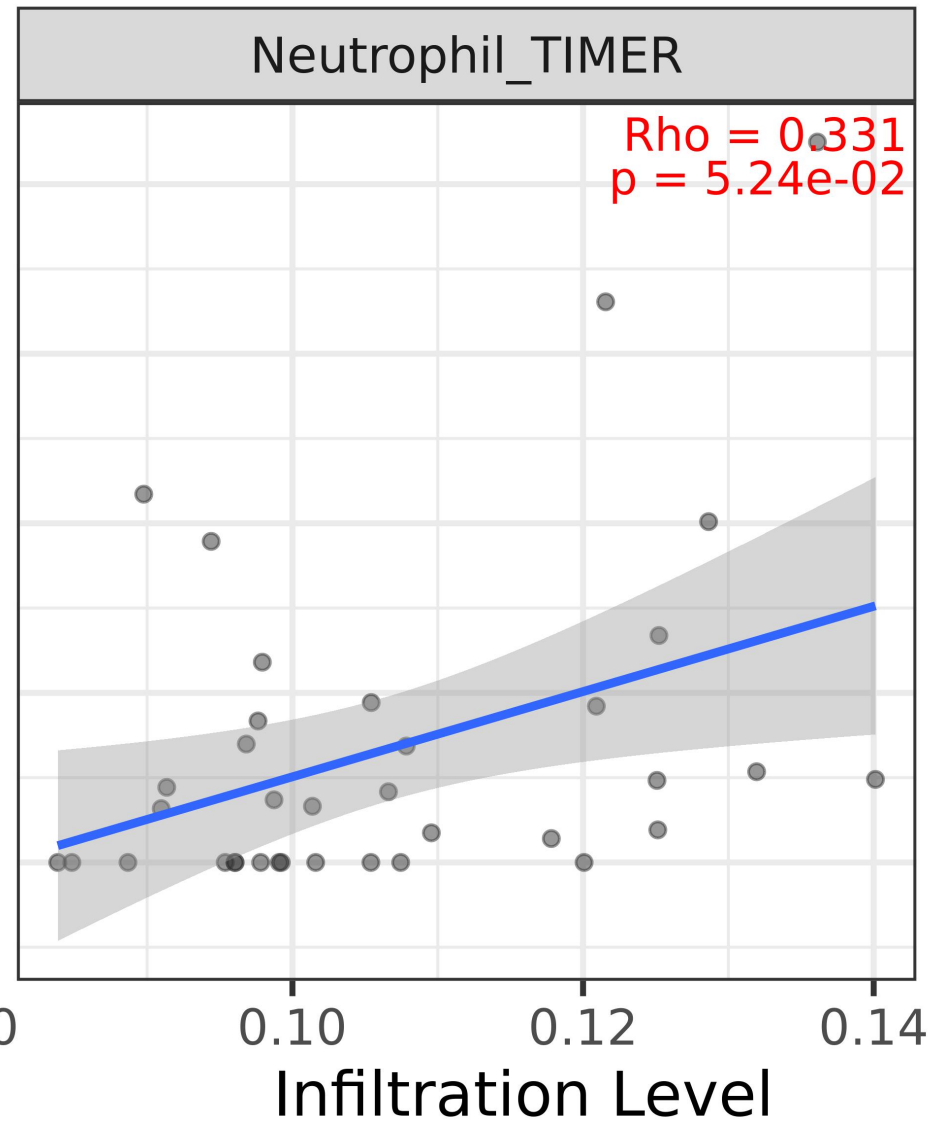

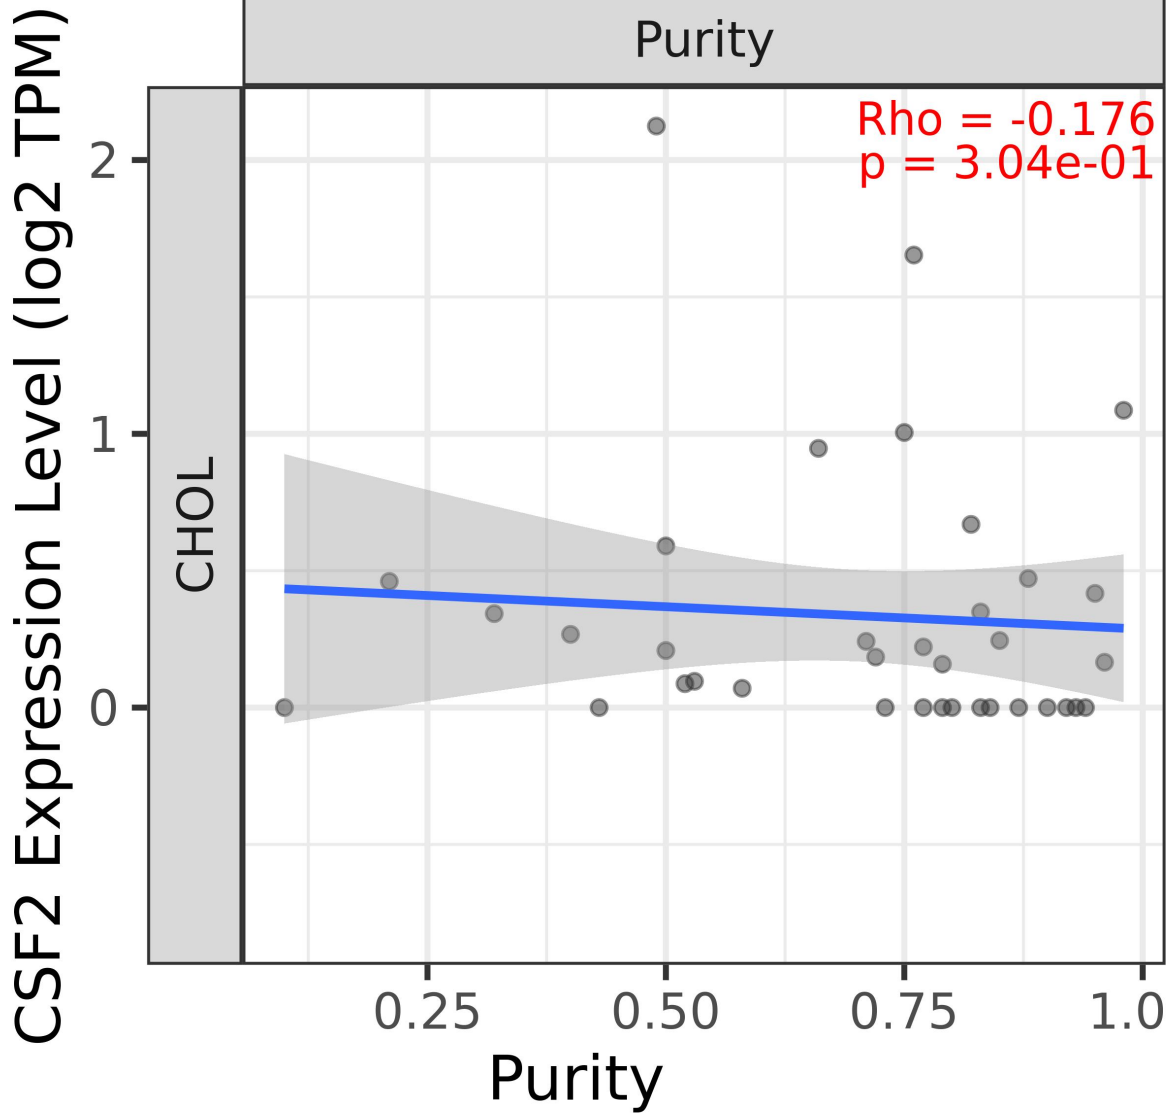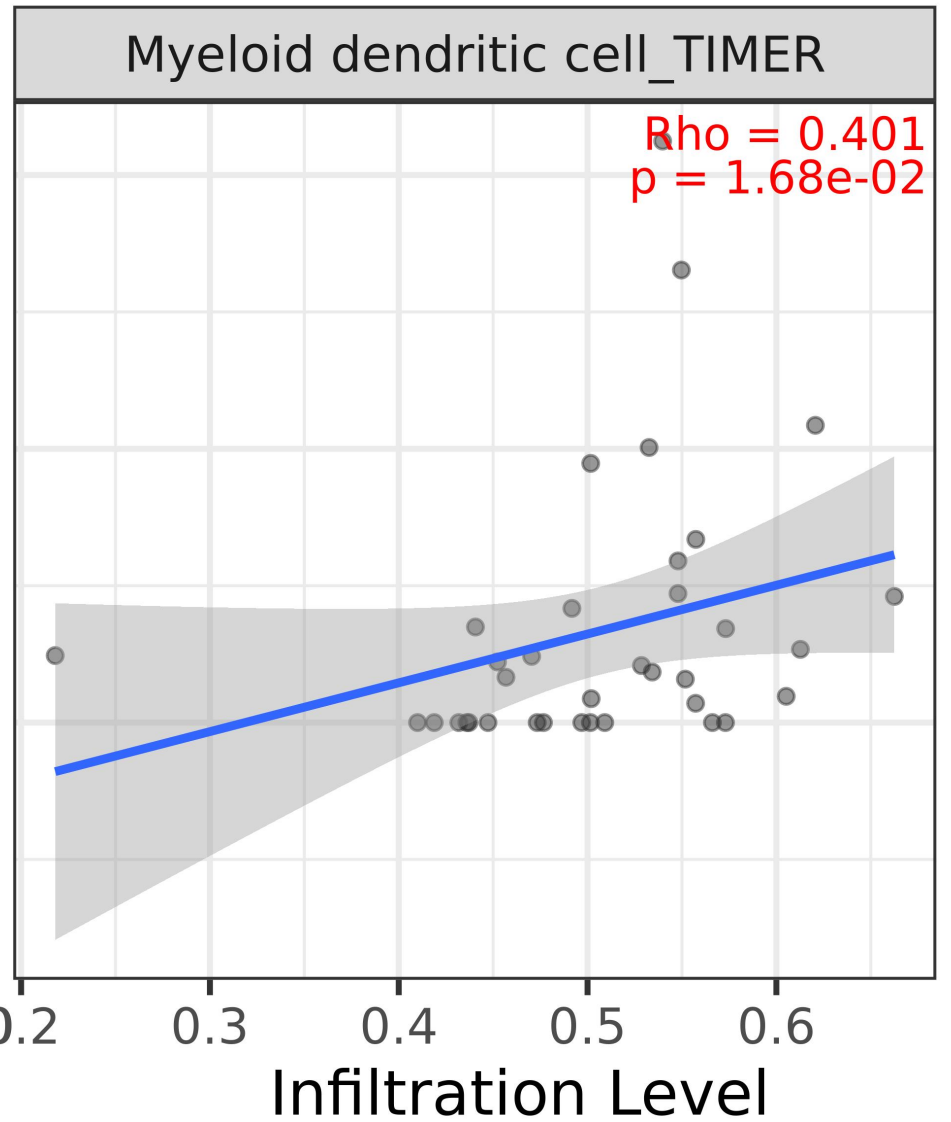

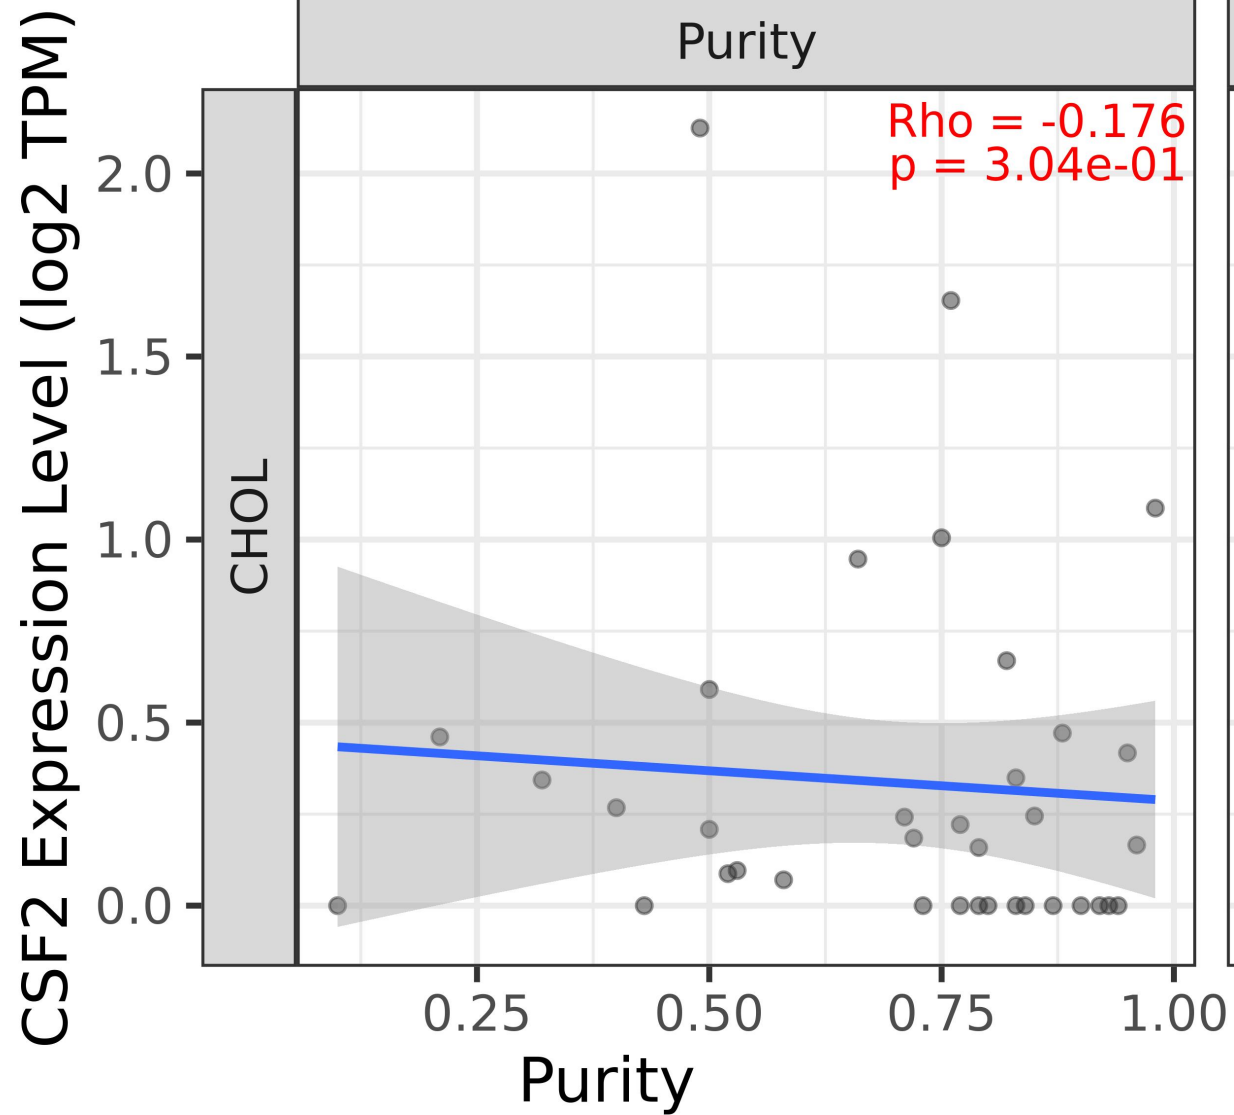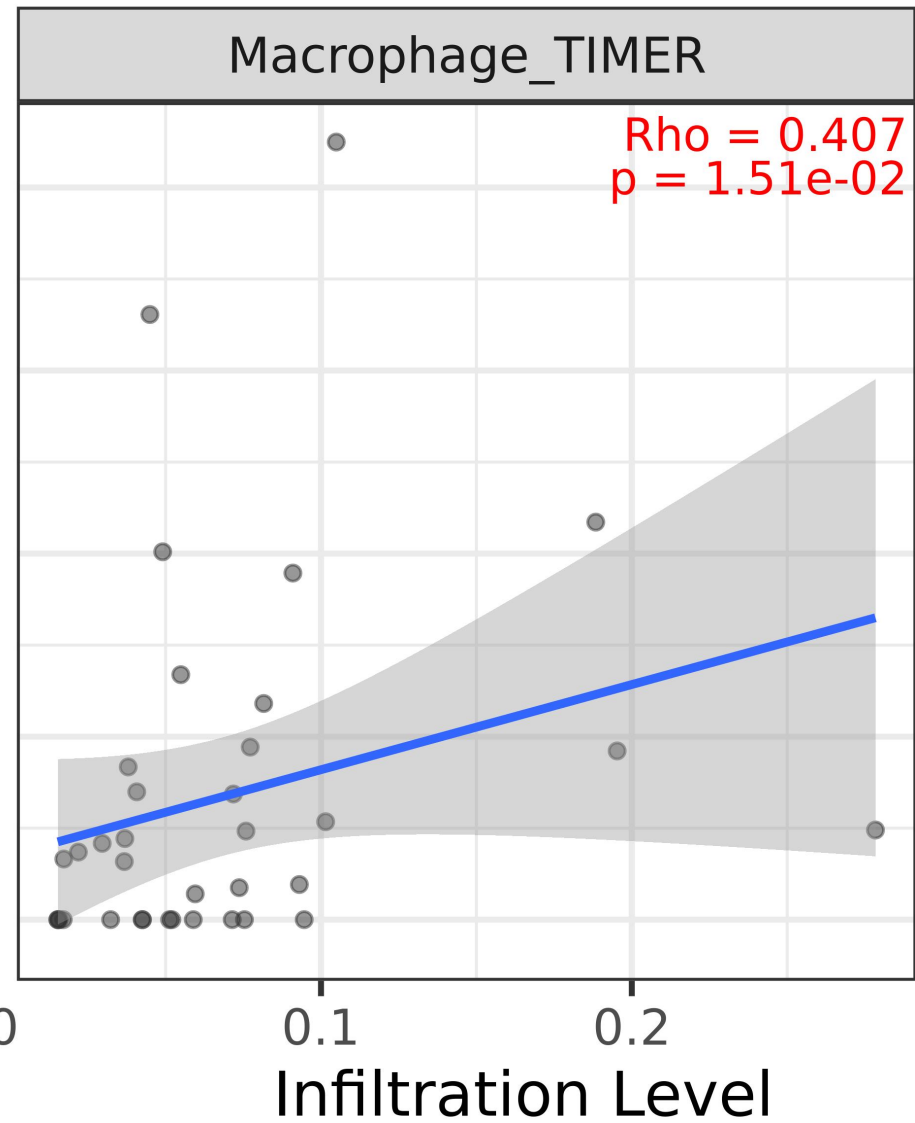

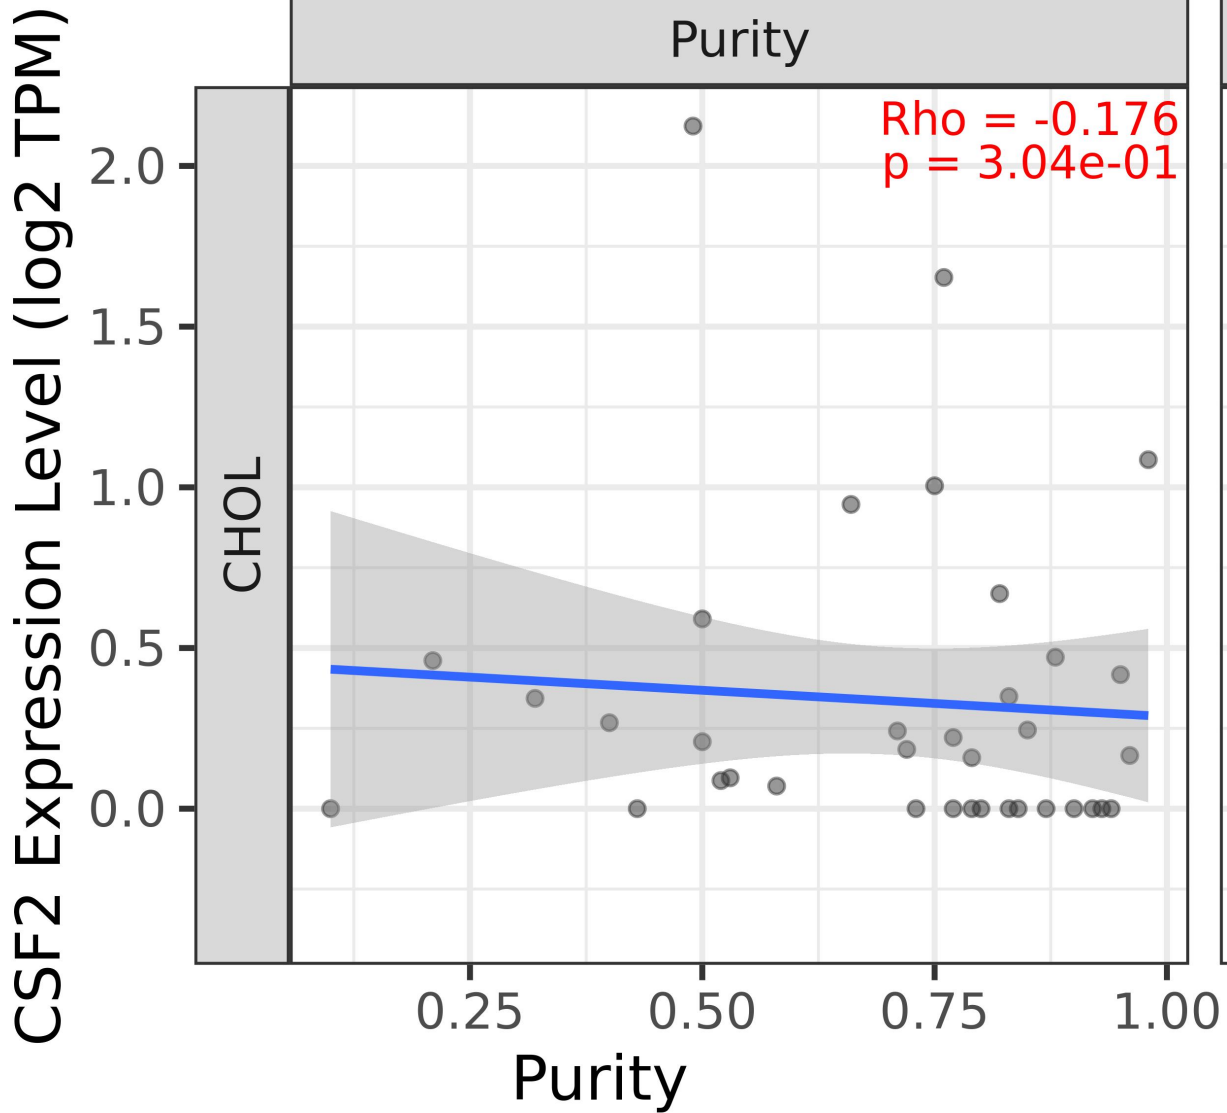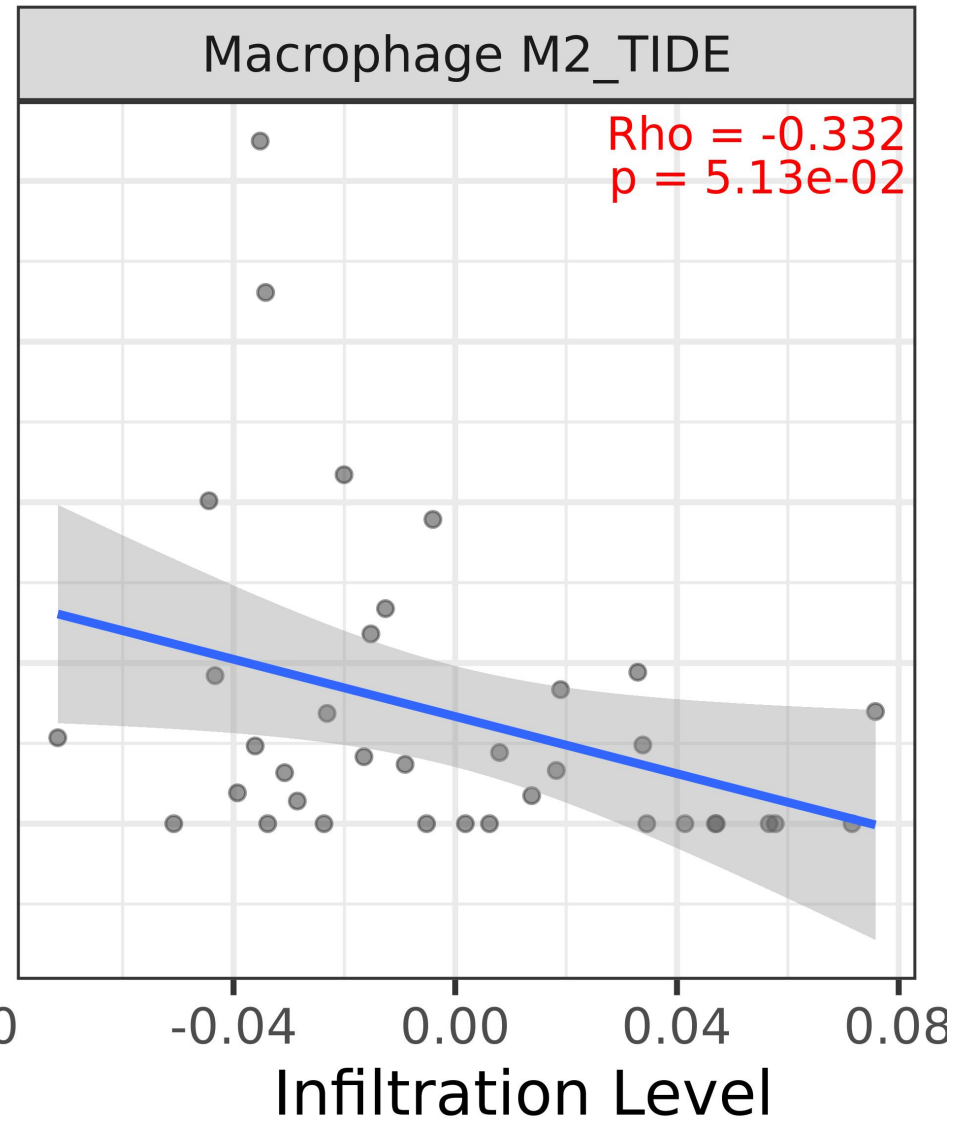

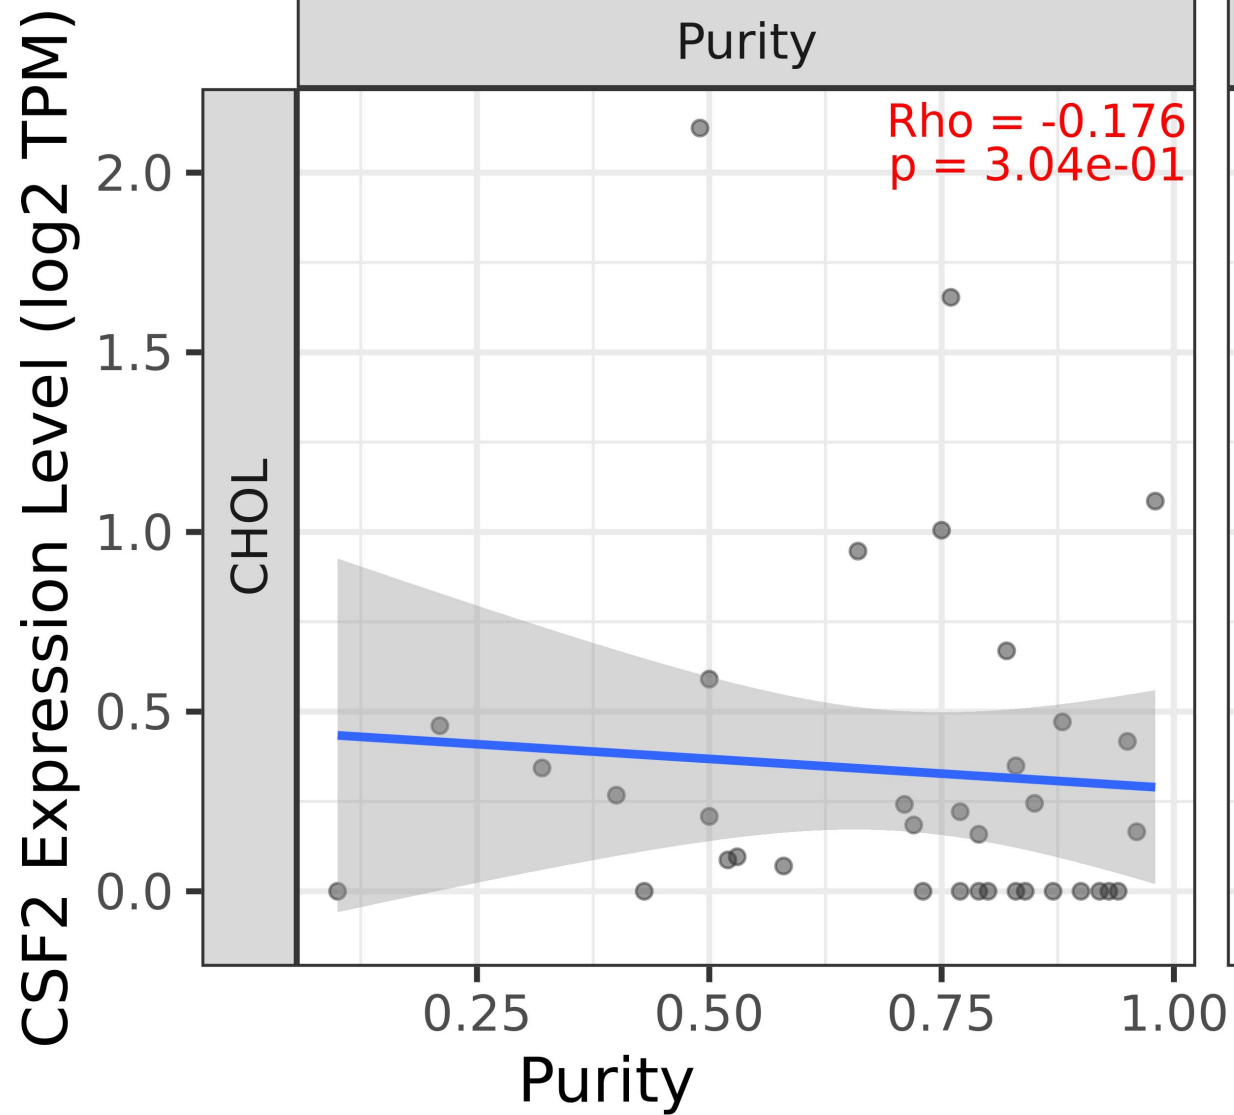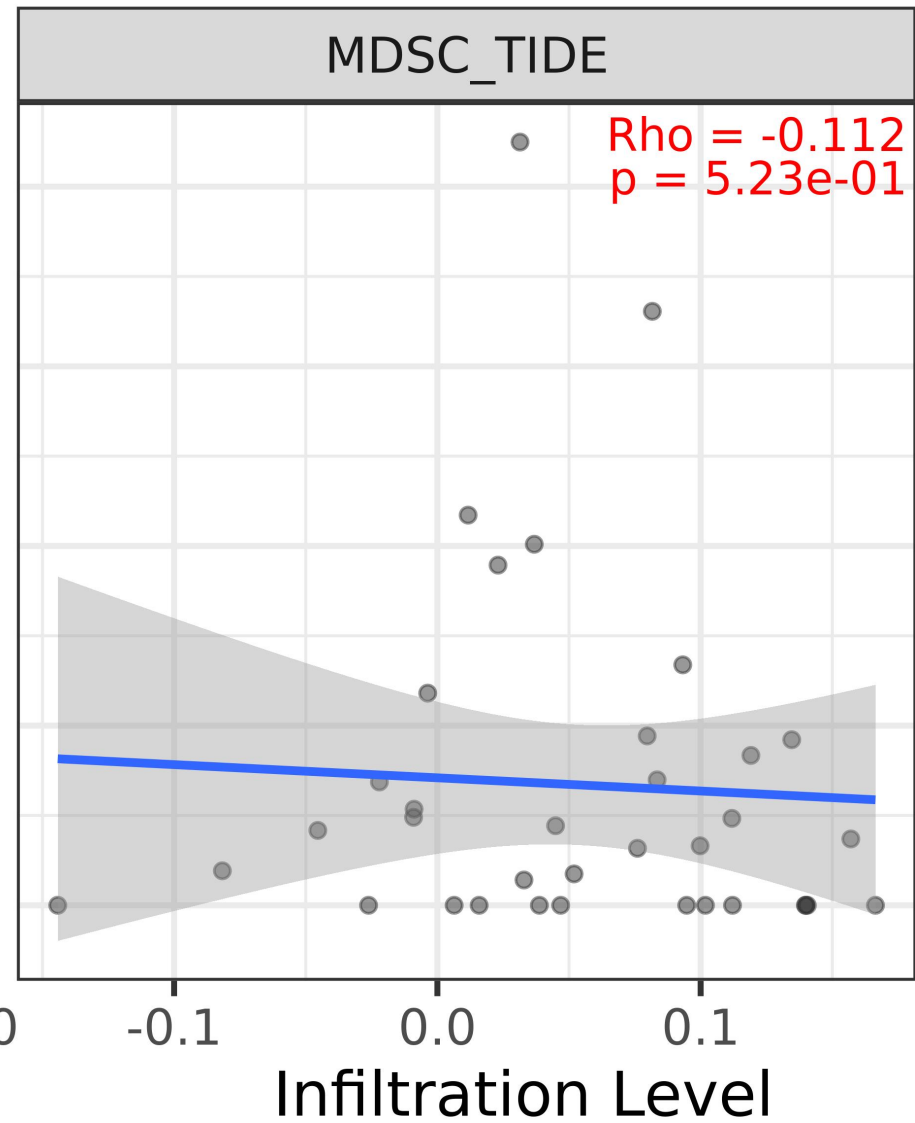



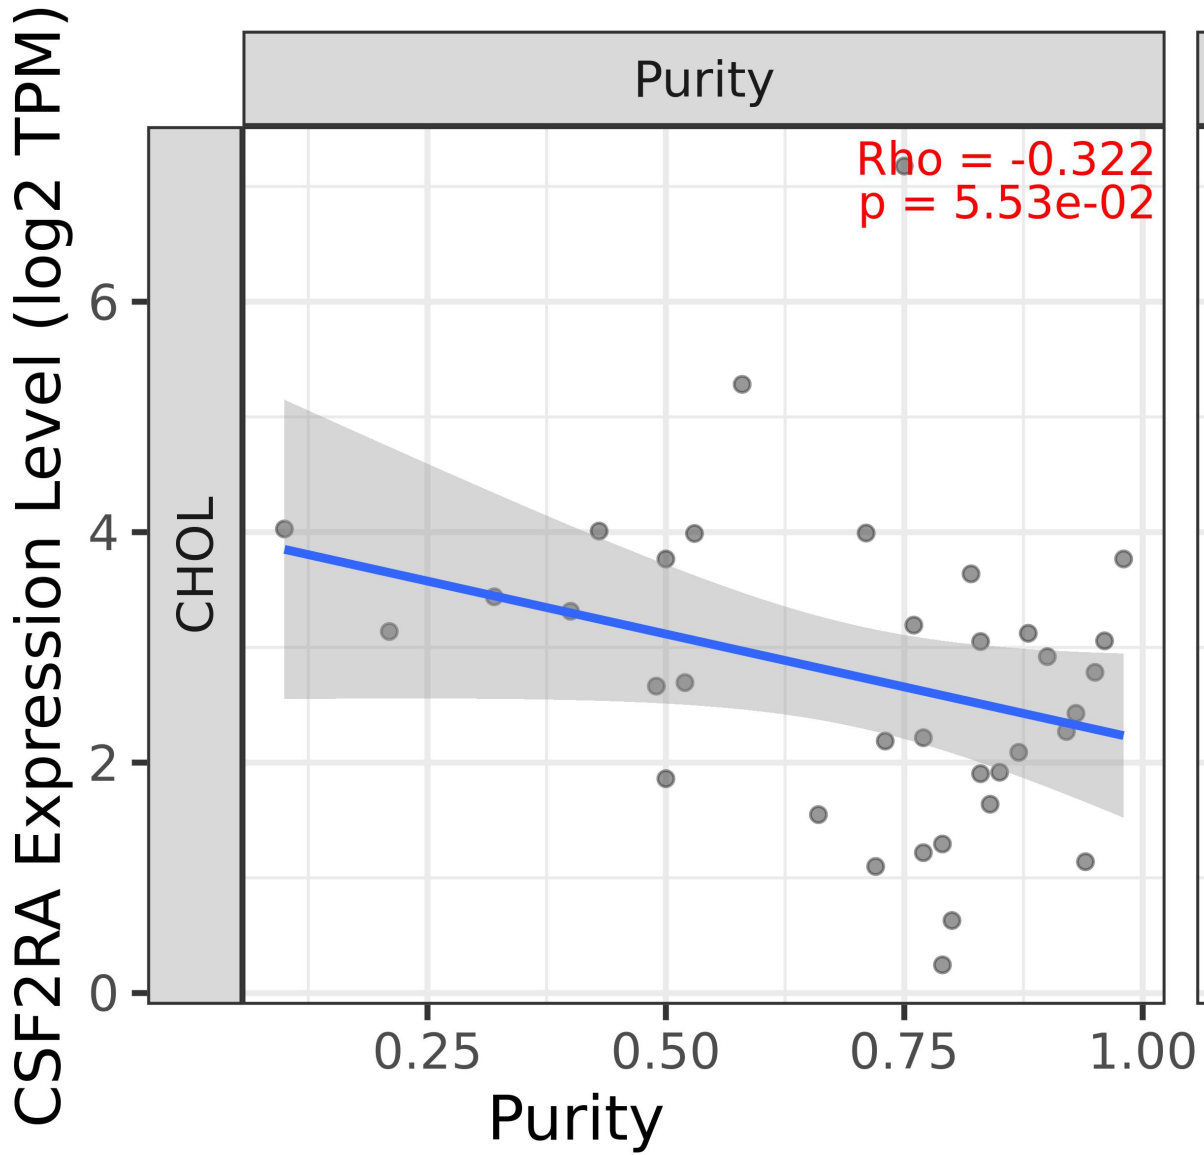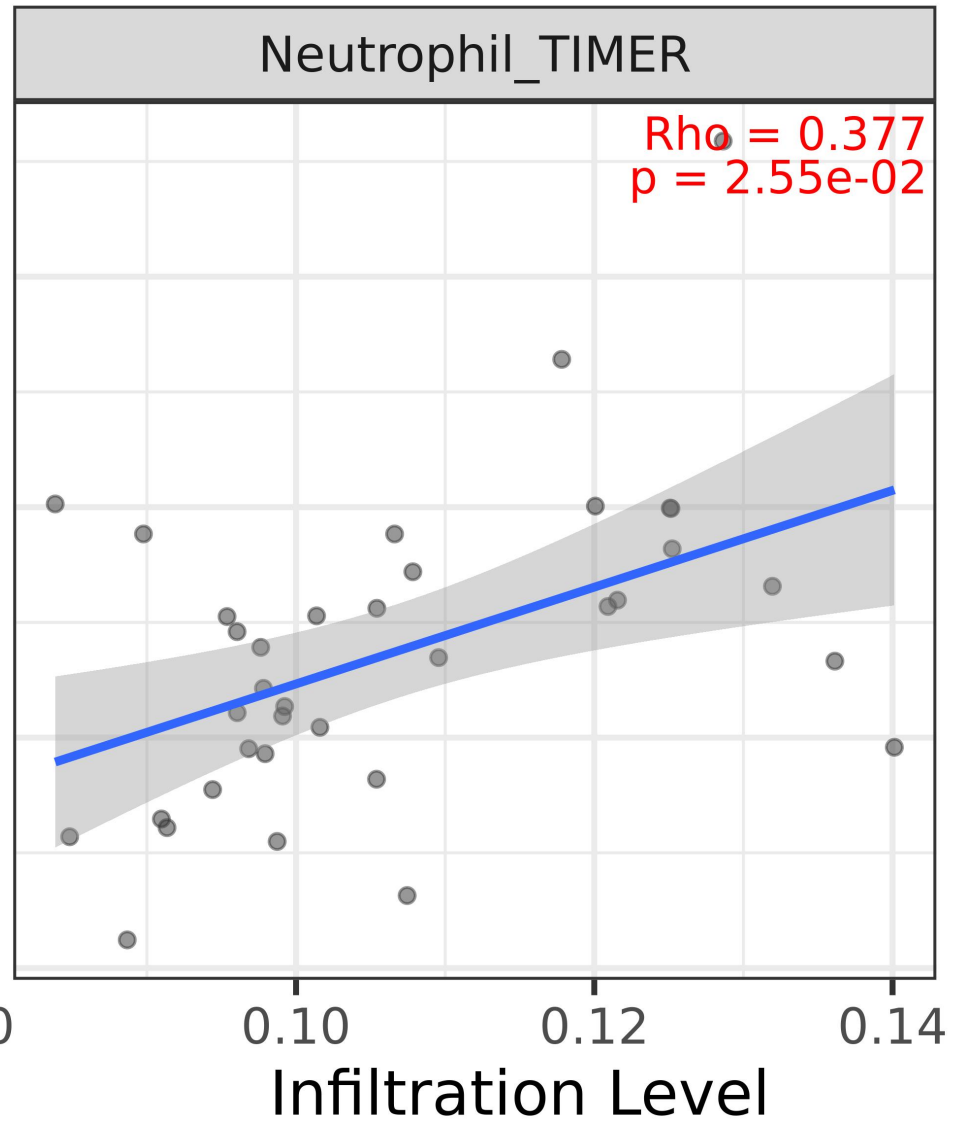

CSF2RA Expression Level (log2 TPM)

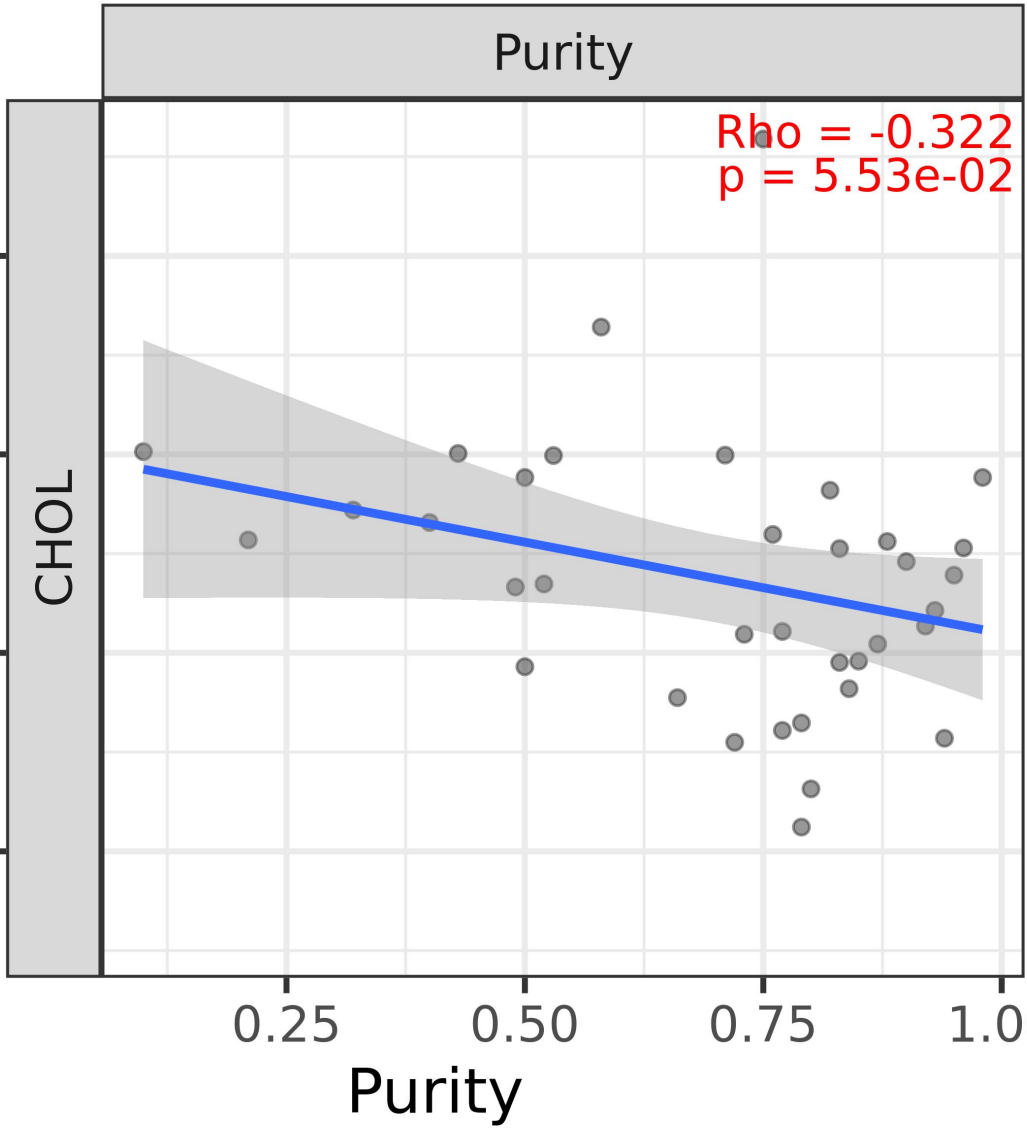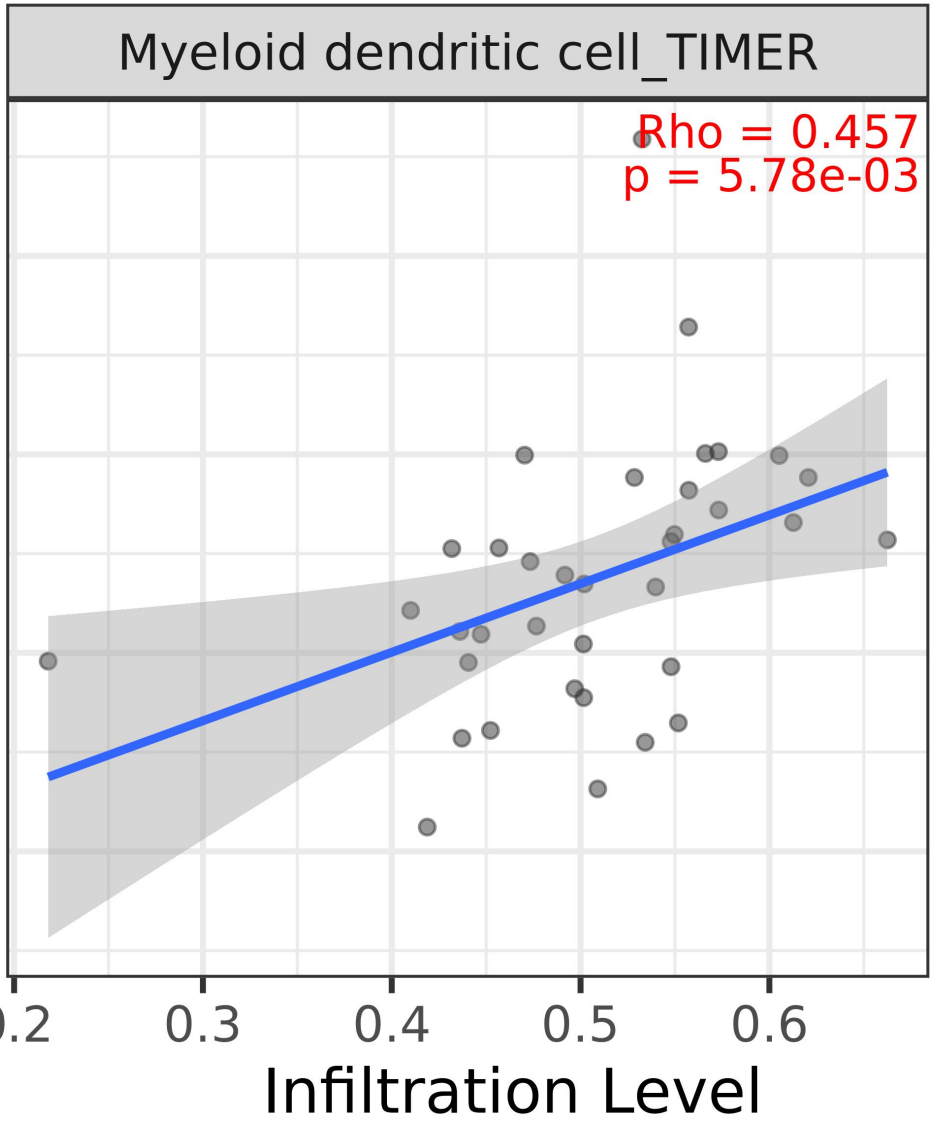



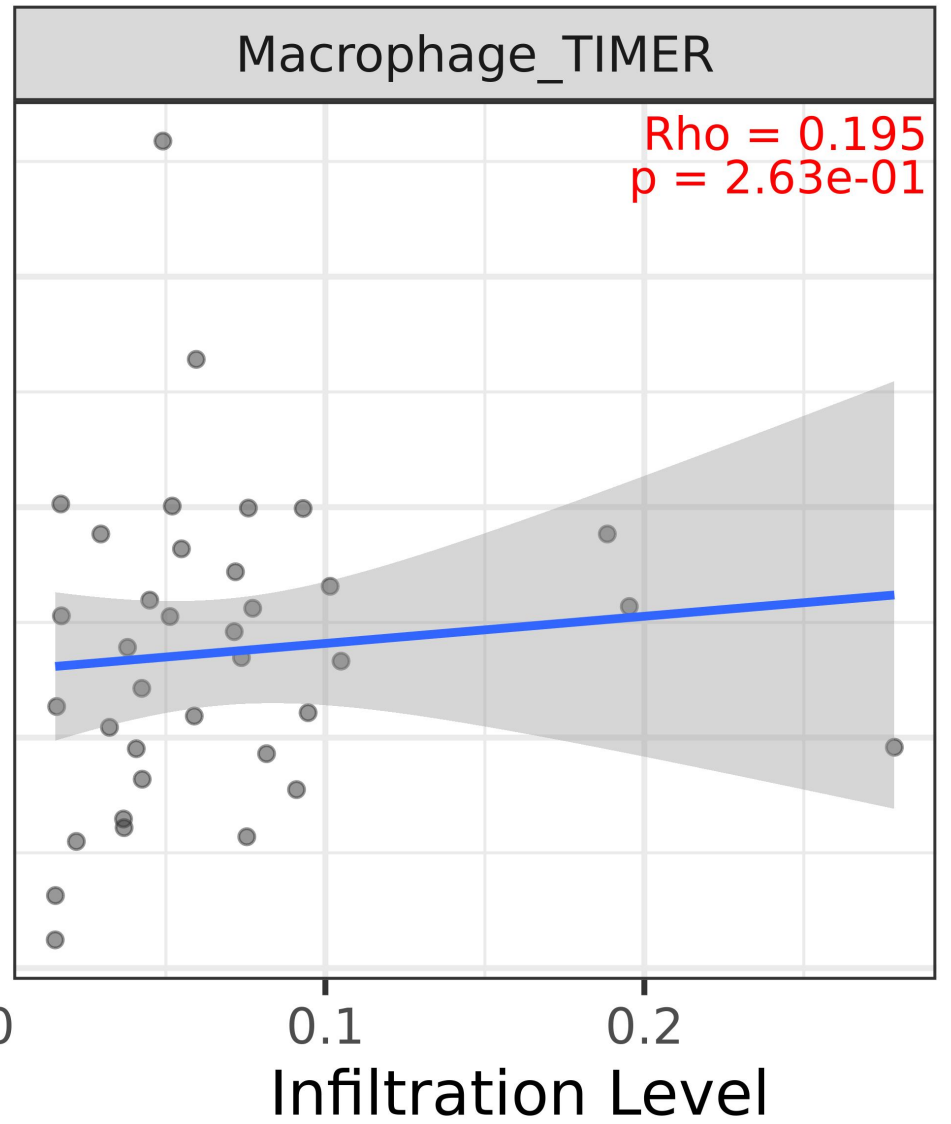

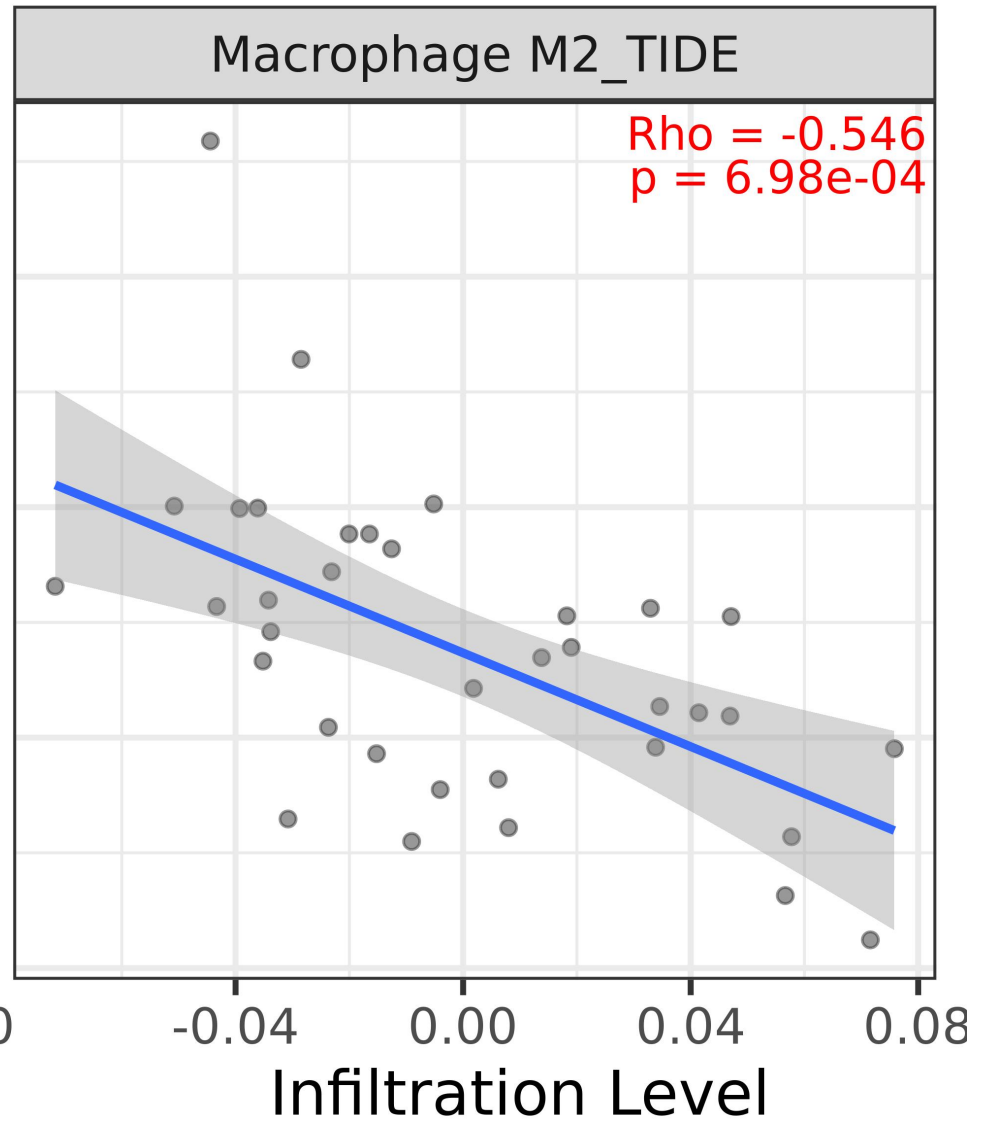

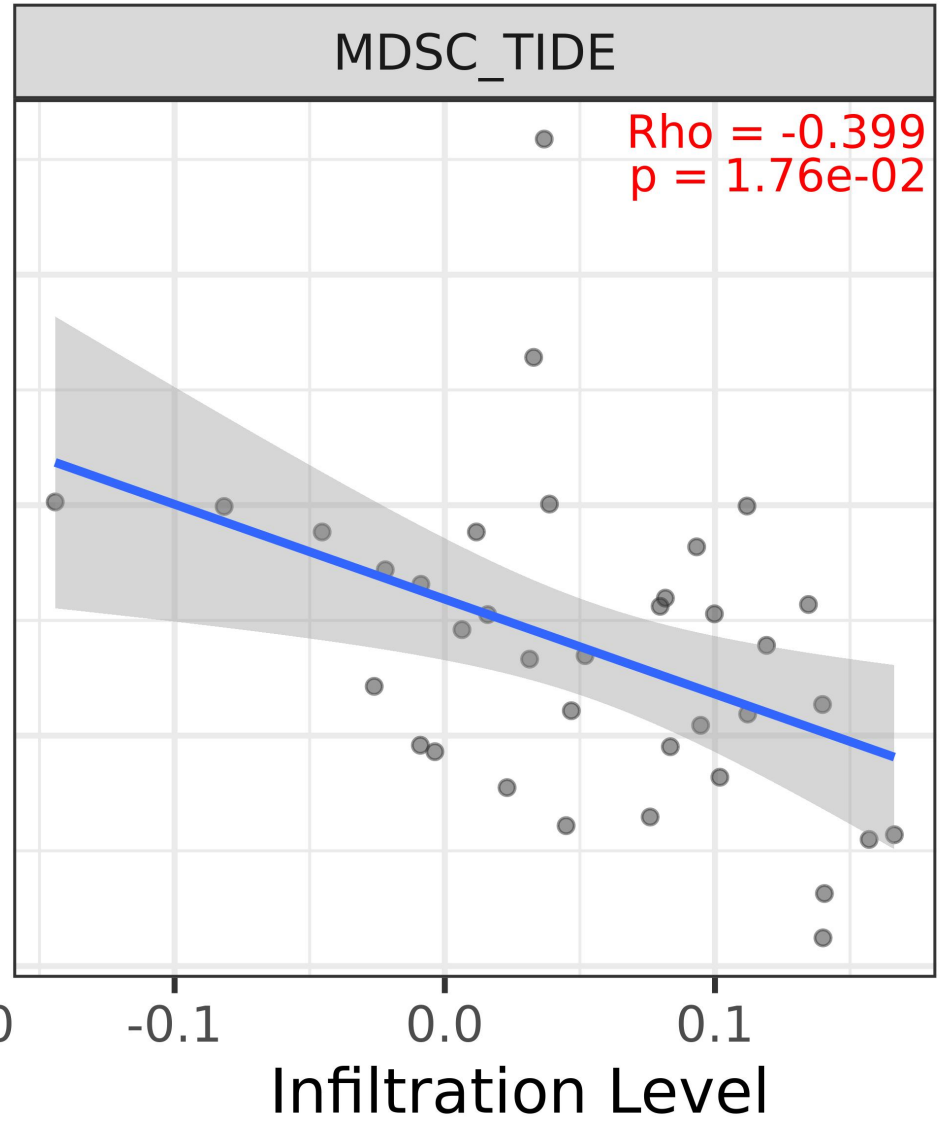

CSF2RA Expression Level (log2 TPM)

CHOL

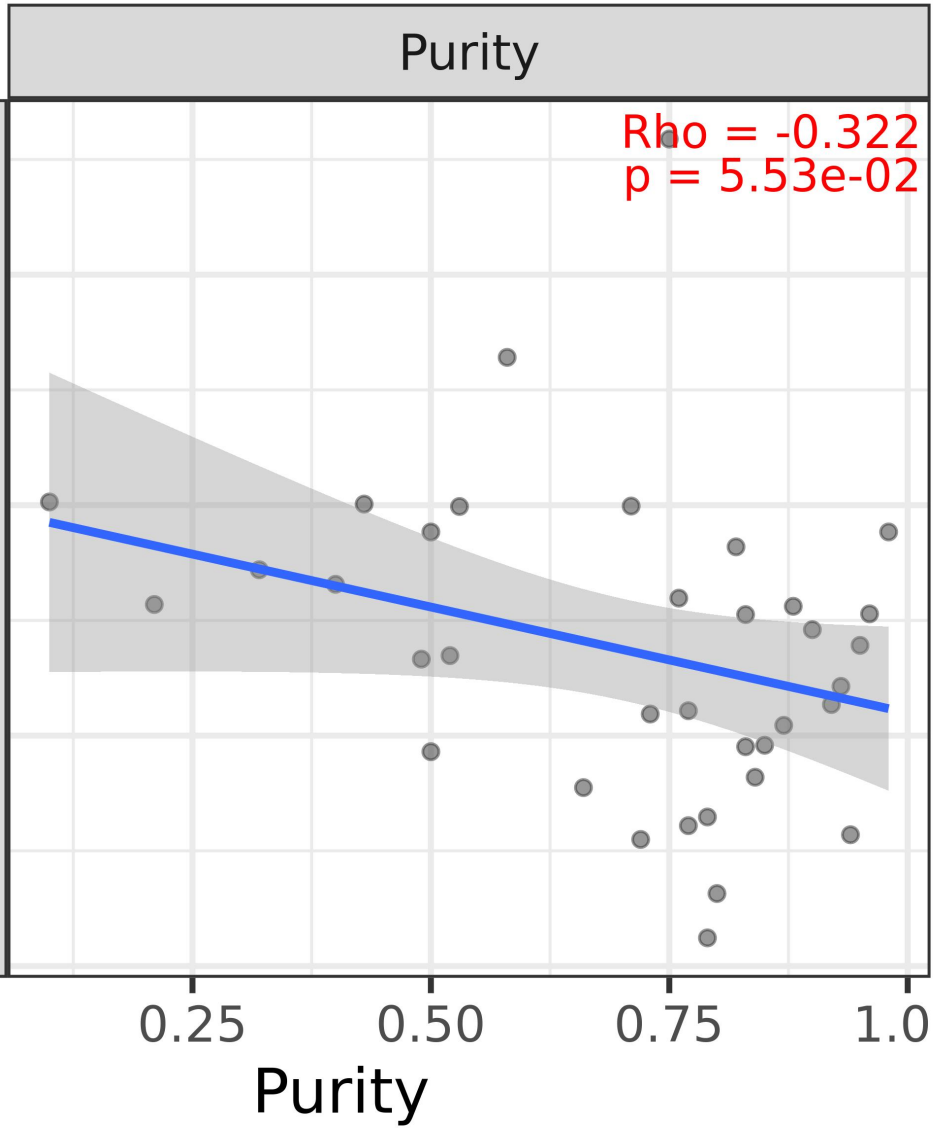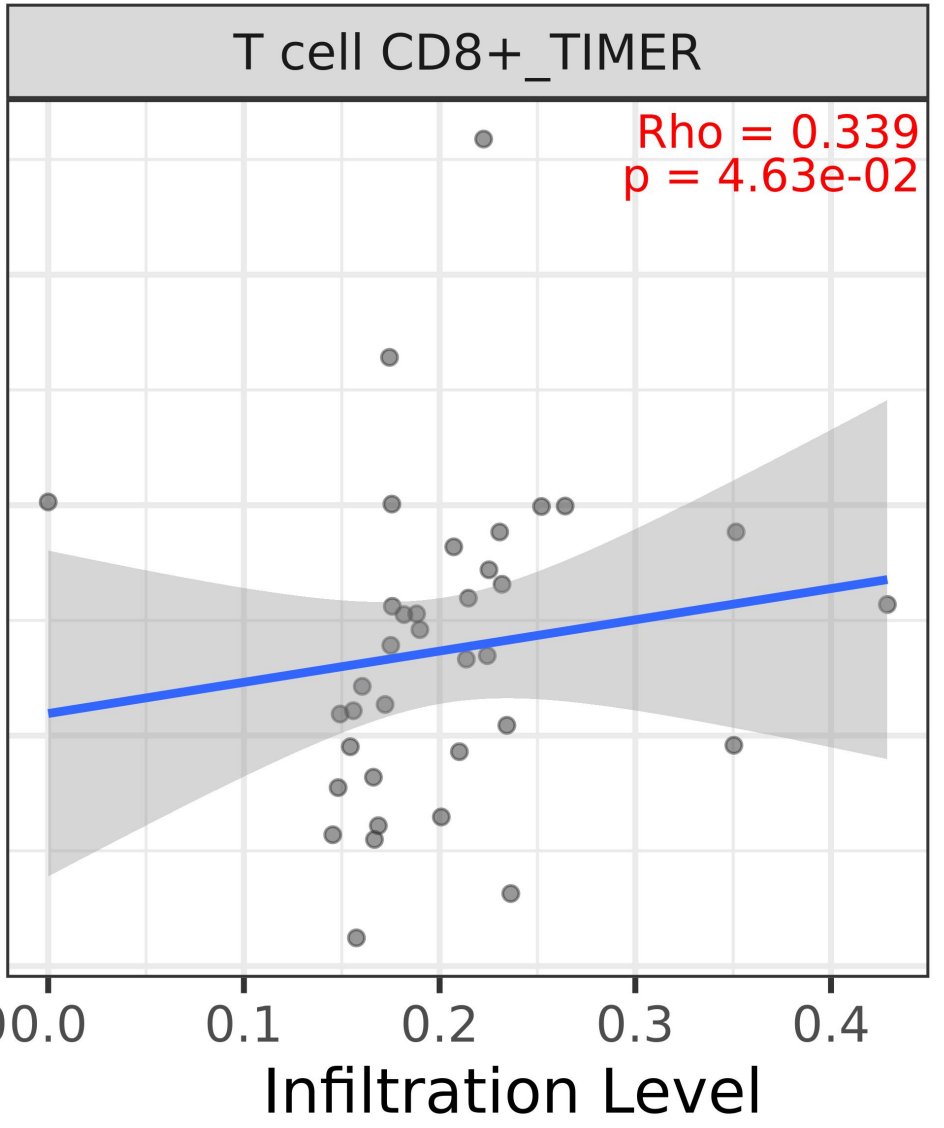

Supplement: Raw_data_Fig5.pdf [file Raw_data_Fig5.pdf]
