# Supplementary material for: Dense GM-CSFR α -expressing immune infiltration is allied with longer survival of intrahepatic cholangiocarcinoma patients
Source: PeerJ journal article supplement (doi:10.7717/peerj.14883), 2023-03-02

# Overall Survival

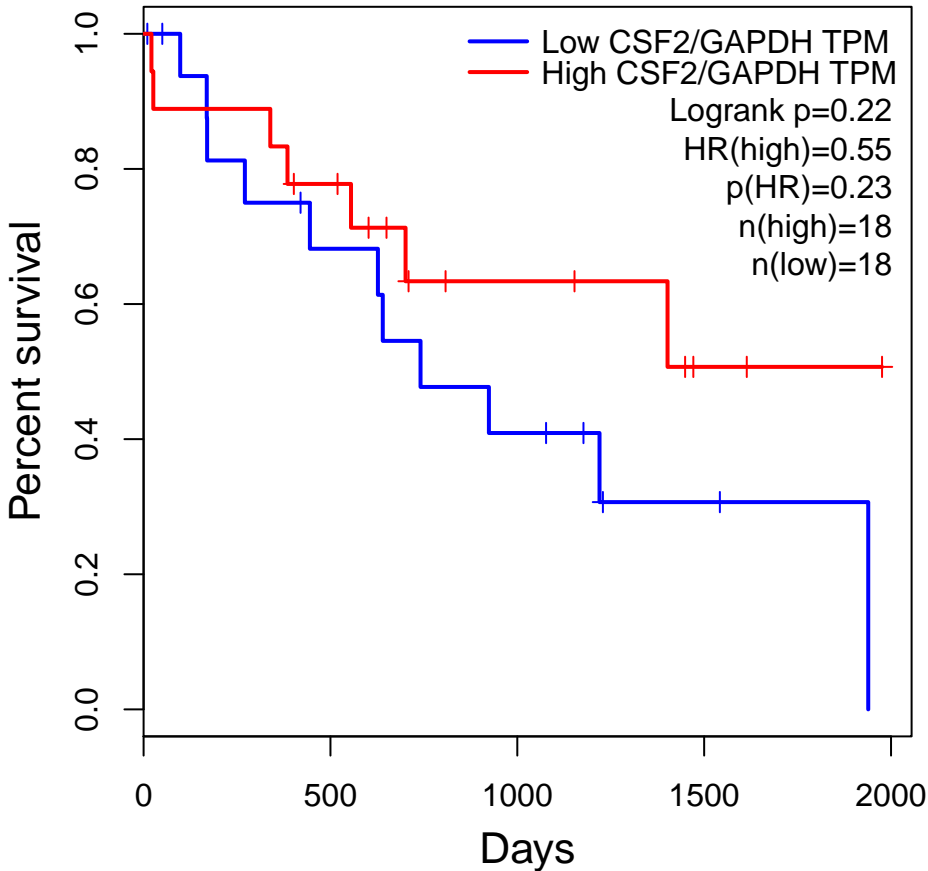

# Disease Free Survival

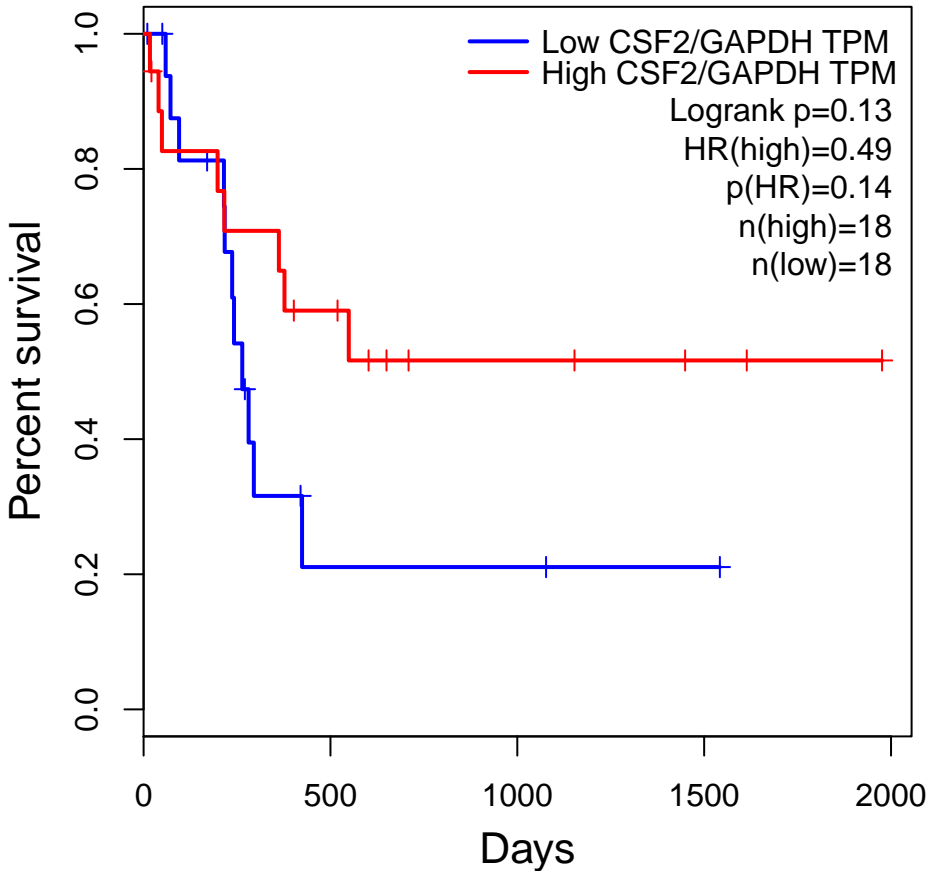

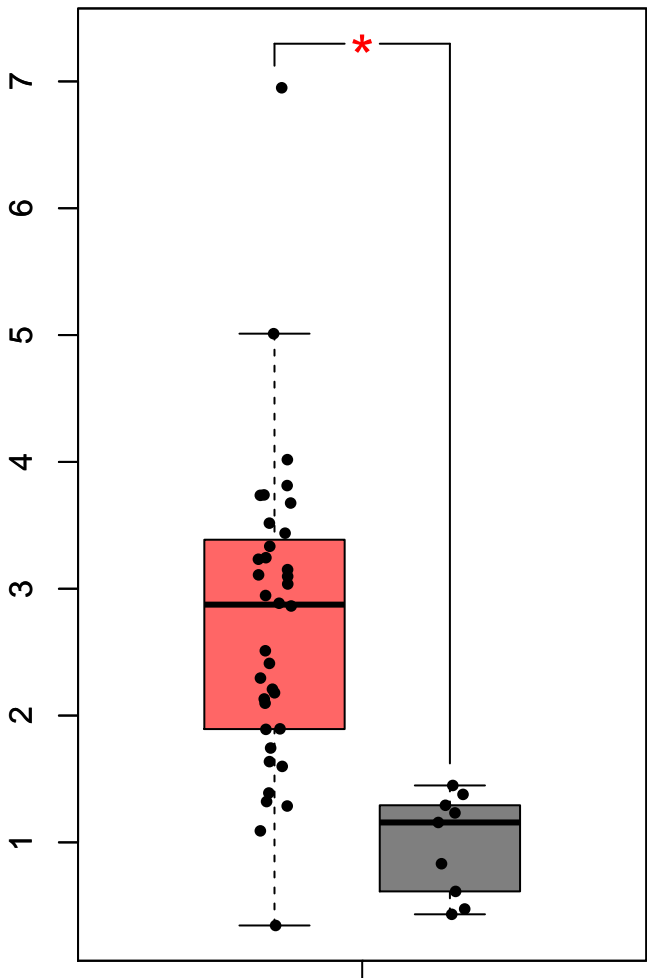

CHOL  
(num(T)=36; num(N)=9)

# Overall Survival

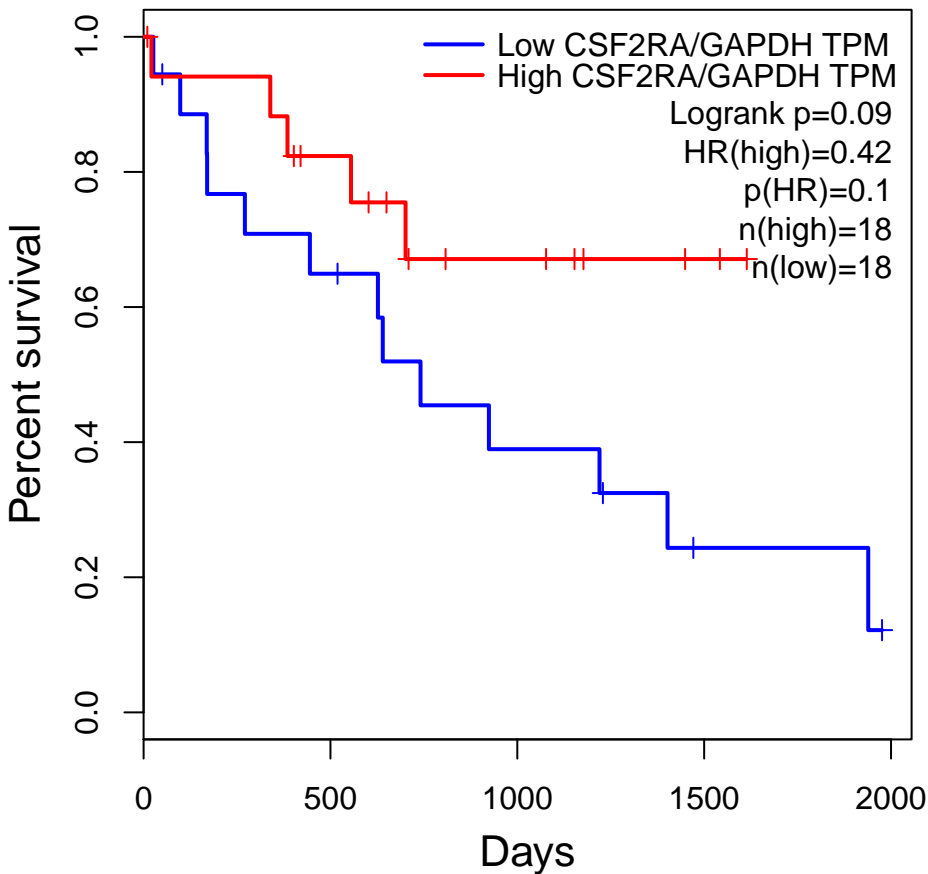

# Disease Free Survival

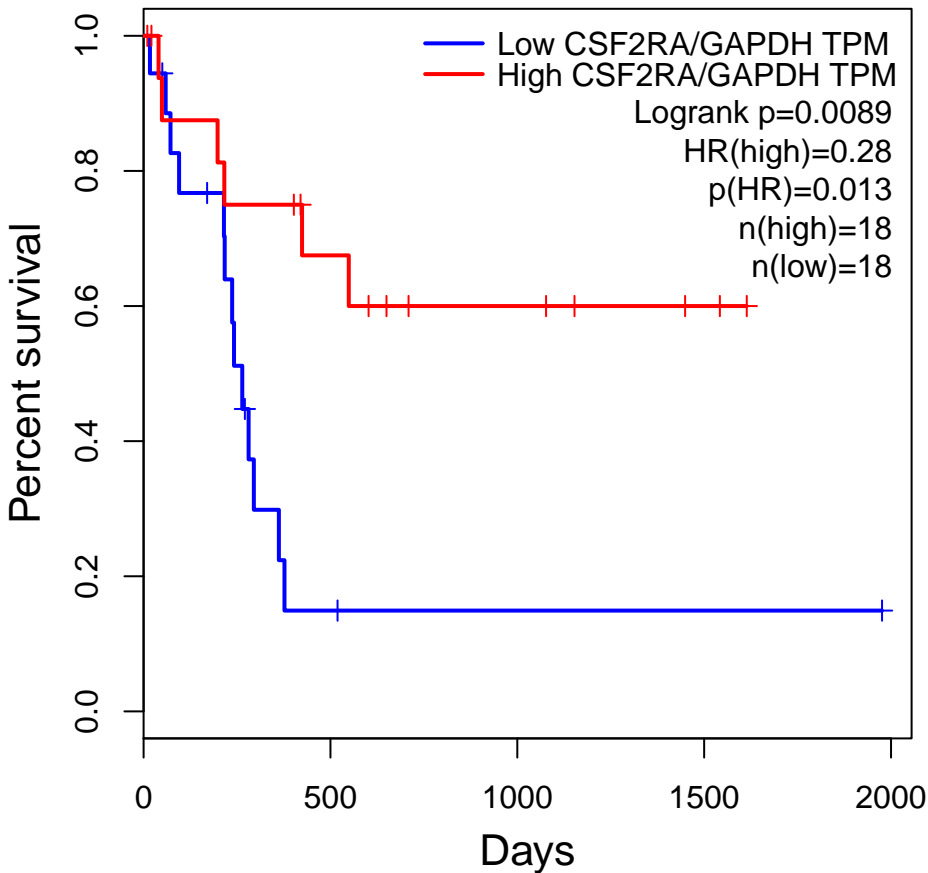

Supplement: Raw_data_Fig1_(GEPIA).pdf [file Raw_data_Fig1_%28GEPIA%29.pdf]
