# Supplementary material for: Dense GM-CSFRα-expressing immune infiltration is allied with longer survival of intrahepatic cholangiocarcinoma patients
Source: PeerJ. 2023 Mar 2;11:e14883. doi: 10.7717/peerj.14883 (PMC9985900; doi:10.7717/peerj.14883)
Supplement: Supplemental Information 6 [file peerj-11-14883-s006.xlsx]

## Sheet: GM-CSF ELISA result
Cell lines	Date	Actual OD at 450 nm	Dilution factor	Calculated Conc.		Cell lines	Conc. (pg/ml)	Mean	SD
KKU-055	2018.04.11	0	No	< 4 pg/ml		KKU-055	< 4 pg/ml	< 4 pg/ml
KKU-100		0.009	No	< 4 pg/ml			< 4 pg/ml
KKU-213A	2018.06.20	1.19	No	78.343			< 4 pg/ml
KKU-213A	2018.06.27	0.566	2	81.27		KKU-100	< 4 pg/ml	< 4 pg/ml
KKU-055	2018.06.29	0.025	No	< 4 pg/ml			< 4 pg/ml
KKU-100		0.032	No	< 4 pg/ml		KKU-213A	78.343	83.7263	5.8082
KKU-213A		0.716	2	93.3318			81.27
KKU-213A		0.377	4	88.32			93.3318
KKU-213B		0.842	2	112.728			88.32
KKU-213B		0.453	4	109.411			80.3582
KKU-213L5		0.538	10	334.195			80.7346
KKU-213L5		0.319	20	363.94		KKU-213B	112.728	100.114	12.8323
KKU-213A	2018.07.06	0.602	2	80.3582			109.411
KKU-213A		0.325	4	80.7346			91.2074
KKU-214L5		0.383	20	485.32			87.1084
KKU-214L5		0.096	100	518.8		KKU-213L5	334.195	349.067	21.0329
KKU-055	2018.08.24	0.021	No	< 4 pg/ml			363.94
KKU-213B		0.648	2	91.2074		KKU-214L5	485.32	544.211	56.2948
KKU-213B		0.348	4	87.1084			518.8
KKU-214L5	2018.10.02	0.706	10	526.017			526.017
KKU-214L5		0.377	20	505.86			505.86
KKU-214L5	2018.11.16	0.635	10	612.35			612.35
KKU-214L5		0.34	20	616.922			616.922
ELISA MAX™ Deluxe Set Human GM-CSF (BioLegend)
