# Supplementary material for: Dense GM-CSFRα-expressing immune infiltration is allied with longer survival of intrahepatic cholangiocarcinoma patients
Source: PeerJ. 2023 Mar 2;11:e14883. doi: 10.7717/peerj.14883 (PMC9985900; doi:10.7717/peerj.14883)
Supplement: Supplemental Information 7 [file peerj-11-14883-s007.xlsx]

## Sheet: Raw data
Date	Cell lines				Date	Cell lines				Date	Cell lines				Date	Cell lines
18.04.09	KKU-213A				18.04.12	KKU-100				18.04.12	KKU-213A				18.04.12	KKU-213B
Date	Cell lines				Date	Cell lines				Date	Cell lines				Date	Cell lines
18.05.11	KKU-055				18.05.11	KKU-213B				18.05.25	KKU-055				18.05.25	KKU-213B
Date	Cell lines				Date	Cell lines				Date	Cell lines				Date	Cell lines
18.06.06	KKU-213A				18.06.06	KKU-213L5				18.06.06	KKU-214L5				18.07.05	KKU-100

## Sheet: KKU-055
Date	Cell lines					Date	Cell lines				Samples		Control	CD116 staining	Fold of MFI
18.05.11	KKU-055					18.05.25	KKU-055				KKU-055_Batch1		277	599	2.16245
											KKU-055_Batch2		441	1076	2.43991
												Mean	2.30118
												SD	0.19619

## Sheet: KKU-100
Date	Cell lines					Date	Cell lines				Samples		Control	CD116 staining	Fold of MFI
18.04.12	KKU-100					18.07.05	KKU-100				KKU-100_Batch1		224	1045	4.66518
											KKU-100_Batch2		146	1450	9.93151
												Mean	7.29834
												SD	3.72386

## Sheet: KKU-213A
Date	Cell lines				Date	Cell lines				Date	Cell lines				Samples		Control	CD116 staining	Fold of MFI
18.04.09	KKU-213A				18.04.12	KKU-213A				18.06.06	KKU-213A				KKU-213A_Batch1		241	240	0.995851
															KKU-213A_Batch2		286	322	1.12587
															KKU-213A_Batch3		336	372	1.10714
																Mean	1.07629
																SD	0.0702886

## Sheet: KKU-213B
Date	Cell lines					Date	Cell lines				Date	Cell lines				Samples		Control	CD116 staining	Fold of MFI
18.04.12	KKU-213B					18.05.11	KKU-213B				18.05.25	KKU-213B				KKU-213B_Batch1		258	257	0.996124
																KKU-213B_Batch2		323	306	0.947368
																KKU-213B_Batch3		444	464	1.04505
																	Mean	0.996179	Undetectable
																	SD	0.0488383

## Sheet: KKU-213L5
Date	Cell lines				Samples		Control	CD116 staining	Fold of MFI
18.06.06	KKU-213L5				KKU-213L5		355	399	1.12394

## Sheet: KKU-214L5
Date	Cell lines				Samples		Control	CD116 staining	Fold of MFI
18.06.06	KKU-214L5				KKU-214L5		338	732	2.16568
