# Supplementary material for: Dense GM-CSFRα-expressing immune infiltration is allied with longer survival of intrahepatic cholangiocarcinoma patients
Source: PeerJ. 2023 Mar 2;11:e14883. doi: 10.7717/peerj.14883 (PMC9985900; doi:10.7717/peerj.14883)
Supplement: Supplemental Information 8 [file peerj-11-14883-s008.xlsx]

## Sheet: 20.10.13 KKU-055_Batch1
KKU-055	0 h			Mean		24 h			Mean		48 h			Mean		72 h			Mean
Media	0.082	0.081	0.079	0.0806667		0.077	0.077	0.077	0.077		0.11	0.106	0.094	0.103333		0.107	0.099	0.096	0.100667
0 ng/ml GM-CSF	0.173	0.172	0.165			0.358	0.329	0.345			0.592	0.612	0.6			0.972	1.021	1.074
1 ng/ml GM-CSF						0.344	0.35	0.356			0.596	0.637	0.644			1.02	1.133	1.047
10 ng/ml GM-CSF						0.354	0.345	0.351			0.605	0.604	0.624			1.023	0.938	1.137
Subtract media	0 h			Mean		24 h			Mean		48 h			Mean		72 h			Mean
0 ng/ml GM-CSF	0.0923333	0.0913333	0.0843333	0.0893333		0.281	0.252	0.268	0.267		0.488667	0.508667	0.496667	0.498		0.871333	0.920333	0.973333	0.921667
1 ng/ml GM-CSF						0.267	0.273	0.279	0.273		0.492667	0.533667	0.540667	0.522333		0.919333	1.03233	0.946333	0.966
10 ng/ml GM-CSF						0.277	0.268	0.274	0.273		0.501667	0.500667	0.520667	0.507667		0.922333	0.837333	1.03633	0.932
Fold change	0 h			Mean	SD	24 h			Mean	SD	48 h			Mean	SD	72 h			Mean	SD
0 ng/ml GM-CSF	1.03358	1.02239	0.94403	1	0.0487936	3.14552	2.8209	3	2.98881	0.162603	5.47015	5.69403	5.5597	5.57463	0.112684	9.75373	10.3022	10.8955	10.3172	0.571042
1 ng/ml GM-CSF						2.98881	3.05597	3.12313	3.05597	0.0671642	5.51493	5.97388	6.05224	5.84701	0.290254	10.291	11.556	10.5933	10.8134	0.660574
10 ng/ml GM-CSF						3.10075	3	3.06716	3.05597	0.0512975	5.61567	5.60448	5.82836	5.68284	0.12615	10.3246	9.37313	11.6007	10.4328	1.11774
20.10.13	KKU-055	Batch1

## Sheet: 20.10.13 KKU-213B_Batch1
KKU-213B	0 h			Mean		24 h			Mean		48 h			Mean		72 h			Mean
Media	0.082	0.081	0.079	0.0806667		0.077	0.077	0.077	0.077		0.11	0.106	0.094	0.103333		0.107	0.099	0.096	0.100667
0 ng/ml GM-CSF	0.192	0.193	0.187			0.459	0.442	0.452			0.921	0.941	0.804			1.642	1.515	1.555
1 ng/ml GM-CSF						0.468	0.449	0.469			0.929	0.917	0.863			1.686	1.63	1.57
10 ng/ml GM-CSF						0.438	0.452	0.473			0.899	0.881	0.852			1.662	1.71	1.509
Subtract media	0 h			Mean		24 h			Mean		48 h			Mean		72 h			Mean
0 ng/ml GM-CSF	0.111333	0.112333	0.106333	0.11		0.382	0.365	0.375	0.374		0.817667	0.837667	0.700667	0.785333		1.54133	1.41433	1.45433	1.47
1 ng/ml GM-CSF						0.391	0.372	0.392	0.385		0.825667	0.813667	0.759667	0.799667		1.58533	1.52933	1.46933	1.528
10 ng/ml GM-CSF						0.361	0.375	0.396	0.377333		0.795667	0.777667	0.748667	0.774		1.56133	1.60933	1.40833	1.52633
Fold change	0 h			Mean	SD	24 h			Mean	SD	48 h			Mean	SD	72 h			Mean	SD
0 ng/ml GM-CSF	1.01212	1.02121	0.966667	1	0.0292232	3.47273	3.31818	3.40909	3.4	0.0776728	7.43333	7.61515	6.3697	7.13939	0.672748	14.0121	12.8576	13.2212	13.3636	0.590303
1 ng/ml GM-CSF						3.55455	3.38182	3.56364	3.5	0.102449	7.50606	7.39697	6.90606	7.2697	0.319607	14.4121	13.903	13.3576	13.8909	0.527377
10 ng/ml GM-CSF						3.28182	3.40909	3.6	3.4303	0.160148	7.23333	7.0697	6.80606	7.03636	0.215578	14.1939	14.6303	12.803	13.8758	0.954286
20.10.13	KKU-213B	Batch1

## Sheet: 20.10.16 KKU-055_Batch2
KKU-055	0 h			Mean		24 h			Mean		48 h			Mean		72 h			Mean
Media	0.088	0.087	0.083	0.086		0.084	0.084	0.08	0.0826667		0.09	0.091	0.093	0.0913333		0.09	0.089	0.089	0.0893333
0 ng/ml GM-CSF	0.191	0.194	0.189			0.37	0.388	0.403			0.745	0.73	0.761			1.104	1.236	1.235
1 ng/ml GM-CSF						0.377	0.366	0.396			0.671	0.689	0.748			1.141	1.204	1.235
10 ng/ml GM-CSF						0.361	0.368	0.386			0.716	0.703	0.781			1.041	1.124	1.098
Subtract media	0 h			Mean		24 h			Mean		48 h			Mean		72 h			Mean
0 ng/ml GM-CSF	0.105	0.108	0.103	0.105333		0.287333	0.305333	0.320333	0.304333		0.653667	0.638667	0.669667	0.654		1.01467	1.14667	1.14567	1.10233
1 ng/ml GM-CSF						0.294333	0.283333	0.313333	0.297		0.579667	0.597667	0.656667	0.611333		1.05167	1.11467	1.14567	1.104
10 ng/ml GM-CSF						0.278333	0.285333	0.303333	0.289		0.624667	0.611667	0.689667	0.642		0.951667	1.03467	1.00867	0.998333
Fold change	0 h			Mean	SD	24 h			Mean	SD	48 h			Mean	SD	72 h			Mean	SD
0 ng/ml GM-CSF	0.996835	1.02532	0.977848	1	0.0238919	2.72785	2.89873	3.04114	2.88924	0.156861	6.2057	6.06329	6.35759	6.20886	0.147177	9.63291	10.8861	10.8766	10.4652	0.72079
1 ng/ml GM-CSF						2.7943	2.68987	2.97468	2.81962	0.144083	5.50316	5.67405	6.23418	5.8038	0.382388	9.98418	10.5823	10.8766	10.481	0.454739
10 ng/ml GM-CSF						2.64241	2.70886	2.87975	2.74367	0.12244	5.93038	5.80696	6.54747	6.09494	0.396732	9.03481	9.82278	9.57595	9.47785	0.403043
20.10.16	KKU-055	Batch2

## Sheet: 20.10.16 KKU-213B_Batch2
KKU-213B	0 h			Mean		24 h			Mean		48 h			Mean		72 h			Mean
Media	0.088	0.087	0.083	0.086		0.084	0.084	0.08	0.0826667		0.09	0.091	0.093	0.0913333		0.09	0.089	0.089	0.0893333
0 ng/ml GM-CSF	0.189	0.196	0.194			0.429	0.454	0.466			0.832	0.822	0.855			1.693	1.771	1.671
1 ng/ml GM-CSF						0.427	0.458	0.457			0.839	0.857	0.871			1.654	1.648	1.64
10 ng/ml GM-CSF						0.432	0.435	0.461			0.862	0.901	0.927			1.631	1.696	1.693
Subtract media	0 h			Mean		24 h			Mean		48 h			Mean		72 h			Mean
0 ng/ml GM-CSF	0.103	0.11	0.108	0.107		0.346333	0.371333	0.383333	0.367		0.740667	0.730667	0.763667	0.745		1.60367	1.68167	1.58167	1.62233
1 ng/ml GM-CSF						0.344333	0.375333	0.374333	0.364667		0.747667	0.765667	0.779667	0.764333		1.56467	1.55867	1.55067	1.558
10 ng/ml GM-CSF						0.349333	0.352333	0.378333	0.36		0.770667	0.809667	0.835667	0.805333		1.54167	1.60667	1.60367	1.584
Fold change	0 h			Mean	SD	24 h			Mean	SD	48 h			Mean	SD	72 h			Mean	SD
0 ng/ml GM-CSF	0.962617	1.02804	1.00935	1	0.0336967	3.23676	3.4704	3.58255	3.42991	0.176419	6.92212	6.82866	7.13707	6.96262	0.158144	14.9875	15.7165	14.7819	15.162	0.491106
1 ng/ml GM-CSF						3.21807	3.50779	3.49844	3.4081	0.164638	6.98754	7.15576	7.2866	7.1433	0.149922	14.6231	14.567	14.4922	14.5607	0.0656427
10 ng/ml GM-CSF						3.2648	3.29283	3.53583	3.36449	0.149045	7.20249	7.56698	7.80997	7.52648	0.305757	14.4081	15.0156	14.9875	14.8037	0.34292
20.10.16	KKU-213B	Batch2

## Sheet: 20.10.20 KKU-055_B3
KKU-055	0 h			Mean		24 h			Mean		48 h			Mean		72 h			Mean
Media	0.083	0.083	0.081	0.0823333		0.086	0.084	0.083	0.0843333		0.086	0.087	0.09	0.0876667		0.089	0.088	0.087	0.088
0 ng/ml GM-CSF	0.205	0.193	0.179			0.41	0.419	0.433			0.73	0.735	0.757			1.249	1.323	1.328
1 ng/ml GM-CSF						0.395	0.413	0.411			0.762	0.727	0.768			1.266	1.229	1.285
10 ng/ml GM-CSF						0.391	0.4	0.401			0.757	0.774	0.78			1.228	1.318	1.26
Subtract media	0 h			Mean		24 h			Mean		48 h			Mean		72 h			Mean
0 ng/ml GM-CSF	0.122667	0.110667	0.0966667	0.11		0.325667	0.334667	0.348667	0.336333		0.642333	0.647333	0.669333	0.653		1.161	1.235	1.24	1.212
1 ng/ml GM-CSF						0.310667	0.328667	0.326667	0.322		0.674333	0.639333	0.680333	0.664667		1.178	1.141	1.197	1.172
10 ng/ml GM-CSF						0.306667	0.315667	0.316667	0.313		0.669333	0.686333	0.692333	0.682667		1.14	1.23	1.172	1.18067
Fold change	0 h			Mean	SD	24 h			Mean	SD	48 h			Mean	SD	72 h			Mean	SD
0 ng/ml GM-CSF	1.11515	1.00606	0.878788	1	0.118298	2.96061	3.04242	3.1697	3.05758	0.105366	5.83939	5.88485	6.08485	5.93636	0.130585	10.5545	11.2273	11.2727	11.0182	0.402164
1 ng/ml GM-CSF						2.82424	2.98788	2.9697	2.92727	0.0896888	6.1303	5.81212	6.18485	6.04242	0.201304	10.7091	10.3727	10.8818	10.6545	0.258891
10 ng/ml GM-CSF						2.78788	2.8697	2.87879	2.84545	0.0500688	6.08485	6.23939	6.29394	6.20606	0.108458	10.3636	11.1818	10.6545	10.7333	0.414742
20.10.20	KKU-055	Batch3

## Sheet: 20.10.20 KKU-213B_B3
KKU-213B	0 h			Mean		24 h			Mean		48 h			Mean		72 h			Mean
Media	0.083	0.083	0.081	0.0823333		0.086	0.084	0.083	0.0843333		0.086	0.087	0.09	0.0876667		0.089	0.088	0.087	0.088
0 ng/ml GM-CSF	0.224	0.192	0.224			0.506	0.513	0.506			1.025	1	0.971			1.664	1.591	1.613
1 ng/ml GM-CSF						0.478	0.503	0.518			0.997	0.958	0.983			1.58	1.63	1.548
10 ng/ml GM-CSF						0.492	0.496	0.487			0.97	1.014	0.998			1.411	1.583	1.458
Subtract media	0 h			Mean		24 h			Mean		48 h			Mean		72 h			Mean
0 ng/ml GM-CSF	0.141667	0.109667	0.141667	0.131		0.421667	0.428667	0.421667	0.424		0.937333	0.912333	0.883333	0.911		1.576	1.503	1.525	1.53467
1 ng/ml GM-CSF						0.393667	0.418667	0.433667	0.415333		0.909333	0.870333	0.895333	0.891667		1.492	1.542	1.46	1.498
10 ng/ml GM-CSF						0.407667	0.411667	0.402667	0.407333		0.882333	0.926333	0.910333	0.906333		1.323	1.495	1.37	1.396
Fold change	0 h			Mean	SD	24 h			Mean	SD	48 h			Mean	SD	72 h			Mean	SD
0 ng/ml GM-CSF	1.08142	0.83715	1.08142	1	0.141032	3.21883	3.27226	3.21883	3.23664	0.0308508	7.15522	6.96438	6.743	6.9542	0.206295	12.0305	11.4733	11.6412	11.715	0.285861
1 ng/ml GM-CSF						3.00509	3.19593	3.31043	3.17048	0.154254	6.94148	6.64377	6.83461	6.80662	0.150816	11.3893	11.771	11.145	11.4351	0.315481
10 ng/ml GM-CSF						3.11196	3.14249	3.07379	3.10941	0.0344218	6.73537	7.07125	6.94911	6.91858	0.170008	10.0992	11.4122	10.458	10.6565	0.678617
20.10.20	KKU-213B	Batch3
