# Supplementary material for: Dense GM-CSFRα-expressing immune infiltration is allied with longer survival of intrahepatic cholangiocarcinoma patients
Source: PeerJ. 2023 Mar 2;11:e14883. doi: 10.7717/peerj.14883 (PMC9985900; doi:10.7717/peerj.14883)
Supplement: Supplemental Information 9 [file peerj-11-14883-s009.xlsx]

## Sheet: 20.10.17 KKU-055_Batch1
GM-CSF	0 ng/ml		1 ng/ml		10 ng/ml
Time (h)	Area	Closure%	Area	Closure%	Area	Closure%
0	110963	0	113325	0	109676	0
6	103135	7.0546	107884	4.80124	104573	4.6528
12	98960	10.8171	103946	8.2762	100495	8.37102
18	91719	17.3427	99127	12.5286	95066	13.3211
24	86676	21.8875	94181	16.893	89999	17.941
KKU-055	20.10.17	Batch1

## Sheet: 20.10.18 KKU-055_Batch2
GM-CSF	0 ng/ml		1 ng/ml		10 ng/ml
Time (h)	Area	Closure%	Area	Closure%	Area	Closure%
0	109914	0	101158	0	99301	0
6	101330	7.80974	95369	5.72273	93446	5.89621
12	92037	16.2645	87035	13.9613	86945	12.443
18	84914	22.7451	82191	18.7499	80089	19.3472
24	77213	29.7514	73532	27.3098	72346	27.1447
KKU-055	20.10.18	Batch2

## Sheet: 20.10.18 KKU-213B_Batch1
GM-CSF	0 ng/ml		1 ng/ml		10 ng/ml
Time (h)	Area	Closure%	Area	Closure%	Area	Closure%
0	118295	0	123545	0	96839	0
6	97818	17.3101	106356	13.9131	82376	14.9351
12	91809	22.3898	99466	19.4901	79176	18.2396
18	87643	25.9115	91142	26.2277	71735	25.9234
24	80965	31.5567	82346	33.3474	66003	31.8425
KKU-213B	20.10.18	Batch1

## Sheet: 20.10.20 KKU-213B_Batch2
GM-CSF	0 ng/ml		1 ng/ml		10 ng/ml
Time (h)	Area	Closure%	Area	Closure%	Area	Closure%
0	133455	0	116417	0	126937	0
6	111164	16.703	93337	19.8253	101824	19.7838
12	107191	19.68	89685	22.9623	96461	24.0088
18	89462	32.9647	79162	32.0013	86897	31.5432
24	79561	40.3836	71093	38.9325	78264	38.3442
KKU-213B	20.10.20	Batch2

## Sheet: 20.10.22 KKU-055_Batch3
GM-CSF	0 ng/ml		1 ng/ml		10 ng/ml
Time (h)	Area	Closure%	Area	Closure%	Area	Closure%
0	116052	0	103644	0	107454	0
6	107604	7.2795	98926	4.55212	101118	5.89648
12	100984	12.9838	94194	9.11775	97069	9.6646
18	95931	17.3379	86272	16.7612	92247	14.1521
24	86558	25.4145	78540	24.2214	84833	21.0518
KKU-055	20.10.22	Batch3

## Sheet: 20.10.28 KKU-213B_Batch3
GM-CSF	0 ng/ml		1 ng/ml		10 ng/ml
Time (h)	Area	Closure%	Area	Closure%	Area	Closure%
0	124083	0	117098	0	109772	0
6	100409	19.0792	103511	11.6031	92291	15.9248
12	95900	22.713	89203	23.8219	86489	21.2103
18	90220	27.2906	74040	36.7709	75023	31.6556
24	73490	40.7735	65533	44.0358	60582	44.8111
KKU-213B	20.10.28	Batch3
